# Supplementary material for: Synthesis and structural characterization of lanthanide(iii) nitrate complexes of a tetraiminodiphenol macrocycle in the solid state and in solution
Source: Royal Society of Chemistry journal article supplement (doi:10.1039/b516306d), 2006-01-01
Supplement: b516306d.pdf [file b516306d.pdf]

## Supplementary Electronic Information

**Synthesis and structural characterization of lanthanide (III) nitrate complexes of a tetraaminodiphenol macrocycle in the solid state and in solution †**

**Pradip Bag,<sup>a</sup> Ulrich Flörke<sup>b</sup> and Kamalaksha Nag<sup>\*a</sup>**

<sup>a</sup> *Department of Inorganic Chemistry, Indian Association for the Cultivation of Science, Jadavpur, Kolkata 700 032, India*

*E-mail : [ickn@iacs.res.in](mailto:ickn@iacs.res.in)*

<sup>b</sup> *Anorganische und Analytische Chemie der Universität Gesamthochschule Paderborn, D-33098, Paderborn, Germany*

---

† Electronic supplementary information (ESI) available: COSY spectrum of **1** (**Fig. S1**), <sup>1</sup>H NMR spectrum of **1** at different temperatures (**Fig. S2**), plots of  $\Delta_{ij} / \langle S_z \rangle_j$  vs  $C_j / \langle S_z \rangle_j$  according to equation (4) for the lanthanide complexes (**Fig. S3**), absorption spectrum of [Nd(LH<sub>2</sub>)(NO<sub>3</sub>)<sub>3</sub>] (**4**) (**Fig. S4**) and absorption spectral data for some of the lanthanide complexes (**Table S1**).

See <http://www.rsc.org/suppdata>

**Electronic supplementary information (ESI)**

**Fig. S1**  $\{^1\text{H} - ^1\text{H}\}$  COSY spectrum of  $[\text{La}(\text{LH}_2)(\text{NO}_3)_3]$  (**1**) in  $(\text{CD}_3)_2\text{SO}$ .

**Fig. S2**  $^1\text{H}$  NMR spectra of  $[\text{La}(\text{LH}_2)(\text{NO}_3)_3]$  (**1**) in  $(\text{CD}_3)_2\text{SO}$  at different temperatures.

**Fig. S3** Plots of  $\Delta_{ij} / \langle S_z \rangle_j$  vs.  $C_j / \langle S_z \rangle_j$  according to equation (4) for the proton **e** in  $\text{Ln}(\text{LH}_2)(\text{NO}_3)_3$  compounds.

**Fig. S4** The absorption spectrum of  $[\text{Nd}(\text{LH}_2)(\text{NO}_3)_3]$  (**4**) in *N,N*-dimethylformamide.

**Table S1** Absorption spectral data for some of the lanthanide (III) complexes.

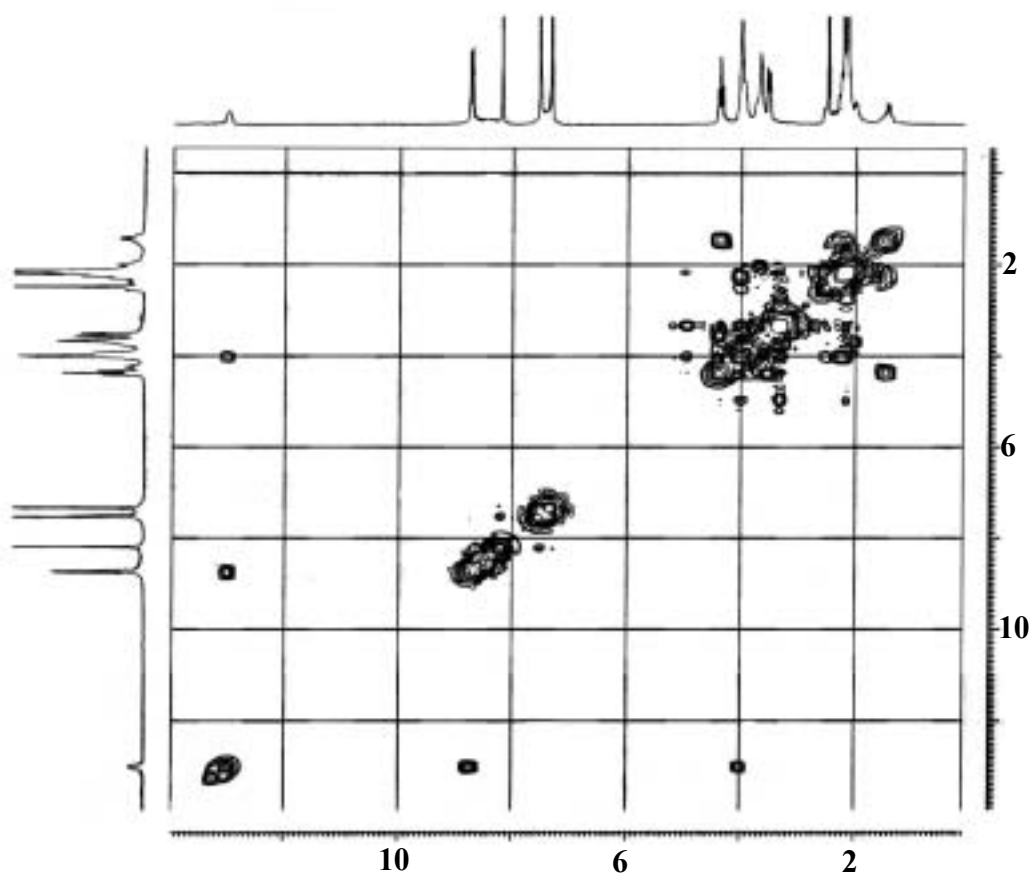

**Fig. S1**  $\{^1\text{H} - ^1\text{H}\}$  COSY spectrum of  $[\text{La}(\text{LH}_2)(\text{NO}_3)_3]$  (**1**) in  $(\text{CD}_3)_2\text{SO}$ .

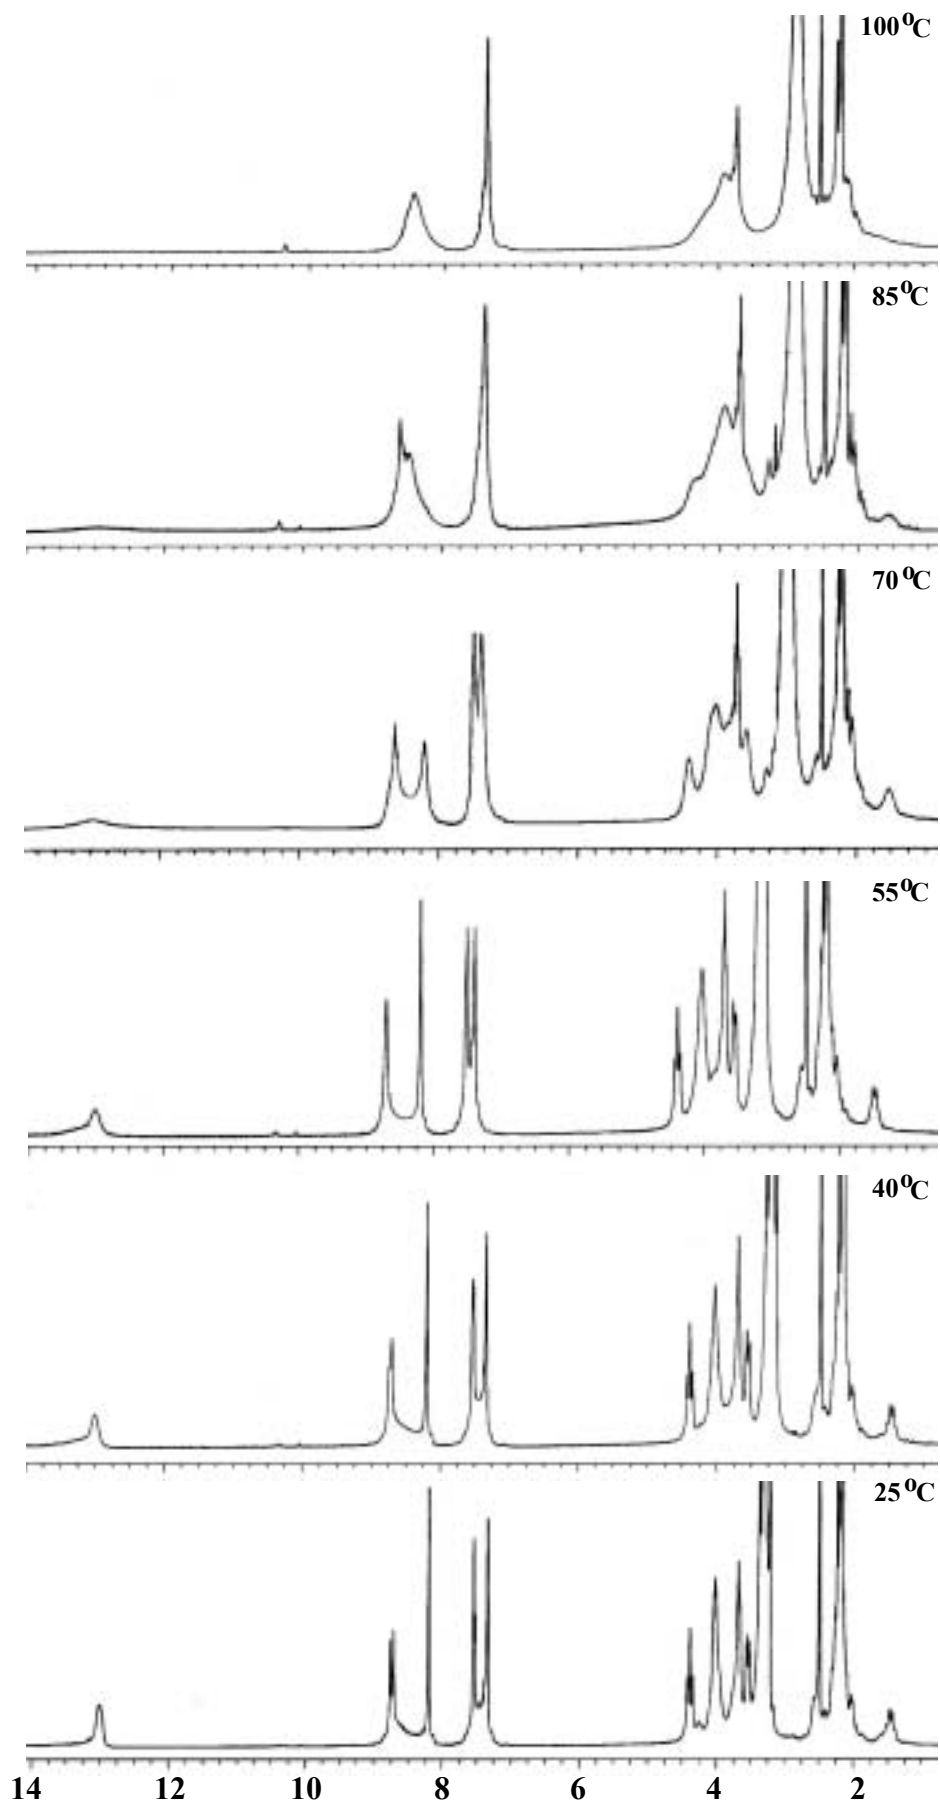

**Fig. S2**  $^1\text{H}$  NMR spectra of  $[\text{La}(\text{LH}_2)(\text{NO}_3)_3]$  (**1**) in  $(\text{CD}_3)_2\text{SO}$  at different temperatures.

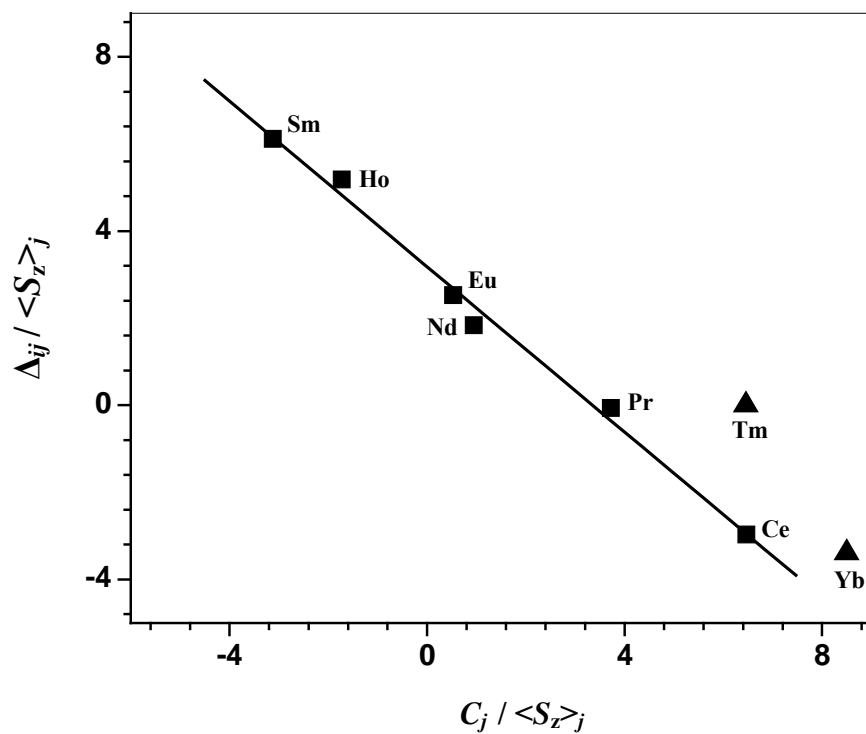

**Fig. S3** Plots of  $\Delta_{ij} / \langle S_z \rangle_j$  vs.  $C_j / \langle S_z \rangle_j$  according to equation (4) for the proton  $e$  in  $\text{Ln}(\text{LH}_2)(\text{NO}_3)_3$  compounds.

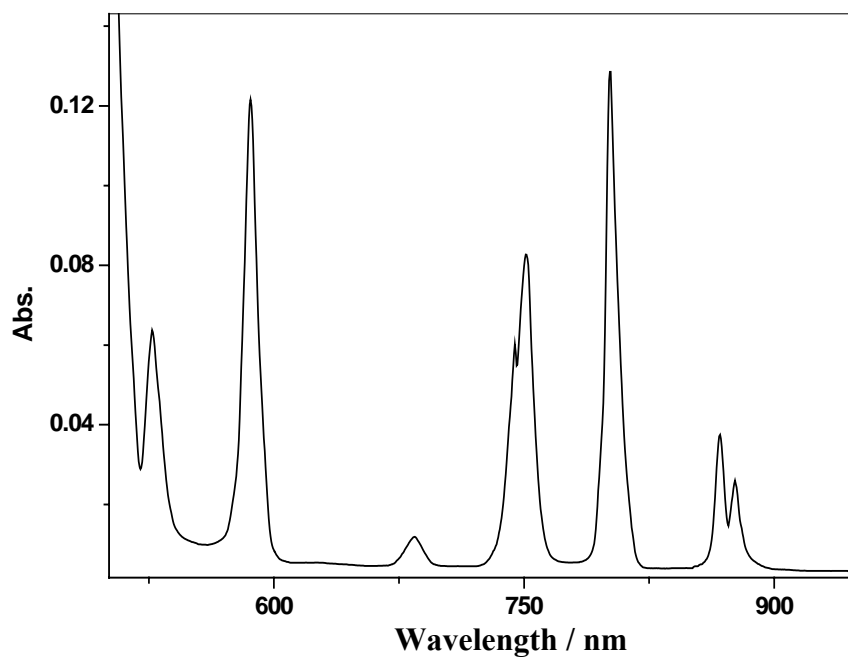

**Fig. S4** The absorption spectrum of  $[\text{Nd}(\text{LH}_2)(\text{NO}_3)_3]$  (**4**) in  $N,N$ -dimethylformamide

**Table S1** Absorption spectral data for some of the lanthanide (III) complexes <sup>a</sup>

| [Ln(LH <sub>2</sub> )(NO <sub>3</sub> ) <sub>3</sub> ] |                                                                                           |                                                                                                               |
|--------------------------------------------------------|-------------------------------------------------------------------------------------------|---------------------------------------------------------------------------------------------------------------|
| Ln <sup>3+</sup>                                       | $\lambda_{\max}$ / nm ( $\epsilon$ / dm <sup>3</sup> mol <sup>-1</sup> cm <sup>-1</sup> ) | Transition                                                                                                    |
| Pr <b>3</b>                                            | 585 (3.5)                                                                                 | <sup>3</sup> H <sub>4</sub> → <sup>1</sup> D <sub>2</sub> <sup>b</sup>                                        |
|                                                        | 1000 (1.5)                                                                                | → <sup>1</sup> G <sub>4</sub>                                                                                 |
| Nd <b>4</b>                                            | 530 (6.3)                                                                                 | <sup>4</sup> I <sub>9/2</sub> → <sup>4</sup> G <sub>7/2</sub> , <sup>4</sup> G <sub>9/2</sub> <sup>b</sup>    |
|                                                        | 585 (12.2)                                                                                | → <sup>4</sup> G <sub>5/2</sub> , <sup>2</sup> G <sub>7/2</sub> <sup>b</sup>                                  |
|                                                        | 685 (1.3)                                                                                 | → <sup>4</sup> F <sub>9/2</sub>                                                                               |
|                                                        | 738 (7.5)                                                                                 | → <sup>4</sup> F <sub>7/2</sub>                                                                               |
|                                                        | 802 (12.9)                                                                                | → <sup>4</sup> F <sub>5/2</sub>                                                                               |
|                                                        | 867 (3.8)                                                                                 | → <sup>4</sup> F <sub>3/2</sub>                                                                               |
| Ho <b>10</b>                                           | 550 (9.8)                                                                                 | <sup>5</sup> I <sub>8</sub> → <sup>5</sup> G <sub>2</sub>                                                     |
|                                                        | 645 (5.4)                                                                                 | → <sup>5</sup> G <sub>3</sub>                                                                                 |
| Er <b>11</b>                                           | 520 (13.5)                                                                                | <sup>4</sup> I <sub>15/2</sub> → <sup>2</sup> H <sub>11/2</sub> , <sup>4</sup> G <sub>11/2</sub> <sup>b</sup> |
|                                                        | 630 (3)                                                                                   | → <sup>4</sup> F <sub>9/2</sub>                                                                               |
|                                                        | 980 (1)                                                                                   | → <sup>4</sup> I <sub>11/2</sub>                                                                              |
| Tm <b>12</b>                                           | 688 (7.0)                                                                                 |                                                                                                               |
|                                                        | 790 (5.4)                                                                                 | <sup>3</sup> H <sub>6</sub> → <sup>3</sup> H <sub>4</sub>                                                     |

<sup>a</sup> In *N,N*-dimethylformamide. <sup>b</sup> Hypersensitive transition.
